# Supplementary material for: Beneficial Effects of an Online Mindfulness-Based Intervention on Sleep Quality in Italian Poor Sleepers during the COVID-19 Pandemic: A Randomized Trial
Source: Int J Environ Res Public Health. 2023 Feb 3;20(3):2724. doi: 10.3390/ijerph20032724 (PMC9914977; doi:10.3390/ijerph20032724)
Supplement: Supplementary file 1 [file ijerph-20-02724-s001.zip › Data.txt]

ID	Sex	Age	Previous_meditation_experience	Drug_insomnia	Type_drug	Group	Adherence_diet	PSQI_Comp1_PRE	PSQI_Comp2_PRE	PSQI_Comp3_PRE	PSQI_Comp4_PRE	PSQI_Comp5_PRE	PSQI_Comp6_PRE	PSQI_Comp7_PRE	PSQI_Score_PRE	SCI_Score_PRE	APS_Score_PRE	FIRST_Score_PRE	IYes_Score_PRE	SHI_Score_PRE	FFMQ_Score_PRE	FFMQ_observe_Score_PRE	FFMQ_describe_Score_PRE	FFMQ_act_Score_PRE	FFMQ_nonjudje_Score_PRE	FFMQ_nonreact_Score_PRE	ERQ_reapp_Score_PRE	ERQ_supp_Score_PRE	PSQI_Comp1_POST	PSQI_Comp2_POST	PSQI_Comp3_POST	PSQI_Comp4_POST	PSQI_Comp5_POST	PSQI_Comp6_POST	PSQI_Comp7_POST	PSQI_Score_POST	SCI_Score_POST	APS_Score_POST	FIRST_Score_POST	IYes_Score_POST	SHI_Score_POST	FFMQ_Score_POST	FFMQ_observe_Score_POST	FFMQ_describe_Score_POST	FFMQ_act_Score_POST	FFMQ_nonjudje_Score_POST	FFMQ_nonreact_Score_POST	ERQ_reapp_Score_POST	ERQ_supp_Score_POST
2	Female	55	Yes	No	NA	TREATED	2	3	2	3	2	2	0	1	13	11	35	23	14	33	3.51282051282051	4.25	3.5	2.875	3.875	3	6	4.75	1	1	2	3	2	0	0	9	17	32	17	6	27	3.87179487179487	4.375	3.875	3.875	4.25	2.85714285714286	5.66666666666667	4.75
4	Female	37	Yes	No	NA	CONTROL	NA	2	3	2	2	2	3	3	17	7	42	20	17	35	2.71794871794872	2.375	3.25	2.75	2.5	2.71428571428571	6.33333333333333	3.75	2	3	3	3	2	2	1	16	12	44	22	22	36	2.64102564102564	2	3.875	2.25	2.75	2.28571428571429	7	1
5	Male	50	Yes	No	NA	TREATED	1	2	3	1	1	2	0	1	10	17	24	23	11	29	3.38461538461538	2.25	3.75	3.75	3.5	3.71428571428571	6.5	2.25	1	3	1	1	1	0	1	8	22	30	18	4	26	3.48717948717949	2.375	4	3.75	3.625	3.71428571428571	6.33333333333333	5
6	Female	58	Yes	No	NA	CONTROL	NA	3	3	3	3	1	2	2	17	9	30	17	15	22	3.33333333333333	3.5	2.625	4.125	3.75	2.57142857142857	4.5	4.25	3	3	3	3	1	2	1	16	9	28	15	9	19	3.43589743589744	3.25	2.125	4.5	4.5	2.71428571428571	5.16666666666667	5
7	Female	42	Yes	No	NA	TREATED	1	2	1	2	1	2	0	1	9	9	41	19	15	22	2.66666666666667	3.125	3	2.375	2.125	2.71428571428571	4	4.75	1	0	0	0	0	0	0	1	29	41	16	7	16	3.15384615384615	3.25	3.125	3.125	3.25	3	5.66666666666667	4.5
10	Female	57	Yes	Yes	Sonirem	CONTROL	NA	2	2	1	1	2	3	2	13	8	40	28	17	32	4.23076923076923	4.875	4.5	3.375	4.375	4	6.83333333333333	2	1	2	2	1	2	2	2	12	14	32	31	15	37	4.07692307692308	4	4.25	3.5	4.375	4.28571428571429	6.83333333333333	3
11	Female	27	Yes	No	Melatonin	CONTROL	NA	1	3	1	1	1	2	1	10	15	42	16	7	41	3.38461538461538	3.875	3.5	2.75	3.75	3	3.33333333333333	1.75	1	1	0	0	1	1	1	5	19	43	15	10	40	3.41025641025641	3.75	3.375	2.875	4.25	2.71428571428571	3.33333333333333	3
14	Male	50	Yes	No	NA	TREATED	1	3	0	2	0	2	0	1	8	14	38	19	10	27	3.17948717948718	3.625	3.625	2.25	3.625	2.71428571428571	4.5	2.75	2	0	3	3	1	0	1	10	13	36	24	13	30	3.23076923076923	4.125	4	2.375	2.125	3.57142857142857	4	2.75
15	Female	66	Yes	No	NA	TREATED	2	3	1	3	0	1	1	2	11	6	46	19	14	27	2.58974358974359	3.625	2.875	2	2.25	2.14285714285714	2.66666666666667	4.5	2	1	2	2	1	0	1	9	12	54	32	16	28	2.53846153846154	3.375	2.875	1.875	2.375	2.14285714285714	2	3.75
18	Female	66	Yes	Yes	rivotril	CONTROL	NA	1	2	1	1	1	2	0	8	23	38	24	8	34	3.46153846153846	4.375	4.125	2.75	3	3	5.83333333333333	3.25	1	2	1	0	2	2	1	9	20	45	27	16	32	3.41025641025641	3.875	4	2.625	3.125	3.42857142857143	4.83333333333333	4.25
19	Female	62	Yes	Yes	melatonin and occasionally Stillnox or Tavor	TREATED	5	2	1	1	1	2	3	2	12	10	36	26	12	29	3.58974358974359	3.625	4.75	2.875	4.5	2	2.5	2	2	1	1	1	2	3	1	11	18	40	28	11	26	3.84615384615385	3.75	5	2.875	4.75	2.71428571428571	5.5	3.75
20	Male	53	YesYes	No	NA	TREATED	5	1	1	2	0	1	0	2	7	14	41	28	14	34	3.07692307692308	2.875	3.125	2.75	3.75	2.85714285714286	5.16666666666667	5.25	1	1	1	1	1	0	0	5	21	38	24	8	37	3.33333333333333	3	3.375	2.875	4.375	3	3.66666666666667	4
22	Female	64	Yes	Yes	Lorazep 1 mg	TREATED	4	2	2	2	2	2	3	1	14	9	48	33	15	29	3.23076923076923	4	3.375	2.875	2.75	3.14285714285714	5	2	1	2	1	2	2	3	1	12	20	42	28	11	28	3.38461538461538	4	3.625	3.25	3.125	2.85714285714286	5.16666666666667	2.5
23	Female	56	Yes	No	melatonin	TREATED	2	2	1	2	2	1	2	1	11	15	37	27	9	27	3.02564102564103	4	3.75	2.875	2.375	2	5.5	3.75	0	1	1	0	1	1	0	4	27	40	33	2	25	3.12820512820513	3.75	3.875	2.875	2.875	2.14285714285714	5.5	2.75
26	Female	68	Yes	Yes	Valerian and melatonin	TREATED	4	2	3	3	2	2	3	1	16	1	29	18	14	25	3.33333333333333	3.75	3.5	2.875	3.25	3.28571428571429	6.16666666666667	5	1	2	1	0	1	0	1	6	21	41	25	4	30	3.07692307692308	3.5	3.75	2.375	2.625	3.14285714285714	5.66666666666667	5
27	Female	24	No	No	NA	TREATED	10	1	2	2	1	2	0	3	11	12	49	33	20	40	2.25641025641026	3.625	2.5	2.125	1.25	1.71428571428571	5.66666666666667	6.25	1	0	1	0	1	0	1	4	24	39	30	5	37	3	3.75	2.125	2.875	3.75	2.42857142857143	1.66666666666667	7
29	Female	36	No	No	NA	CONTROL	NA	2	3	2	0	2	2	2	13	4	47	36	17	44	2.87179487179487	3.875	3.375	2.25	1.875	3	3.33333333333333	4	2	3	2	2	2	0	2	13	11	47	34	22	37	3	4.125	3.25	2.75	2.125	2.71428571428571	4.66666666666667	4.25
30	Female	55	Yes	No	NA	TREATED	6	3	1	3	3	1	2	1	14	13	35	21	10	22	3.23076923076923	2.5	3.5	3.625	3.75	2.71428571428571	4.33333333333333	3.25	2	1	1	1	1	1	1	8	17	33	15	8	20	3.23076923076923	3	3.75	3.75	3.125	2.42857142857143	4.16666666666667	3
32	Female	55	Yes	No	NA	CONTROL	NA	1	0	2	3	1	1	1	9	16	44	26	15	29	3.84615384615385	4.75	4	3.5	2.75	4.28571428571429	6.5	1.75	1	0	1	2	1	0	1	6	18	44	28	10	22	3.66666666666667	4.875	3.875	3.625	2.375	3.57142857142857	6.66666666666667	1.5
33	Male	50	No	No	NA	CONTROL	NA	2	3	1	1	3	2	2	14	10	38	17	16	24	3.87179487179487	3.25	4	4.75	4.125	3.14285714285714	5.5	5.5	2	3	2	3	3	0	1	14	12	33	18	11	33	3.46153846153846	3.75	4	3.625	3.125	2.71428571428571	6	2
35	Female	44	Yes	Yes	Zolpeduar	CONTROL	NA	3	2	1	1	2	3	2	14	0	41	30	14	29	3	4.625	3.375	2.375	1.625	3	5	4.25	2	0	1	0	2	0	1	6	17	37	24	12	25	3.25641025641026	3.625	3.875	2.125	3.375	3.28571428571429	5.33333333333333	4
36	Female	35	Yes	Yes	xanax and melatonin	CONTROL	NA	1	3	1	0	1	3	1	10	12	39	24	7	33	3.02564102564103	3.125	4.875	3	2.375	1.57142857142857	4.66666666666667	2.25	2	3	1	2	2	3	2	15	12	41	27	9	33	2.69230769230769	3.125	3.875	2.75	1.875	1.71428571428571	4.66666666666667	1.5
37	Female	69	Yes	No	NA	CONTROL	NA	3	3	2	3	1	1	1	14	13	41	22	13	23	3.05128205128205	3.625	2.25	3.25	3.75	2.28571428571429	5.16666666666667	3.5	2	2	2	3	1	0	1	11	15	47	28	11	25	2.87179487179487	3.25	3	2.75	3.125	2.14285714285714	5	2.5
38	Female	61	Yes	No	NA	TREATED	4	1	1	1	1	2	0	0	6	24	31	17	4	22	3.64102564102564	3.25	4.25	4	3.875	2.71428571428571	4.66666666666667	1.5	1	1	0	0	2	0	0	4	25	35	19	4	23	3.61538461538462	3.125	4.25	4	4	2.57142857142857	4.5	3.25
40	Male	65	YesYes	Yes	trittico	CONTROL	NA	2	3	3	3	1	3	1	16	11	38	30	11	31	2.76923076923077	3	2.625	2.625	2.875	2.71428571428571	4.16666666666667	4.5	2	3	2	2	1	3	1	14	16	37	24	14	29	2.84615384615385	2.75	2.625	3.375	3.125	2.28571428571429	3.83333333333333	4.25
43	Female	46	Yes	No	NA	TREATED	1	2	2	2	3	2	0	1	12	13	28	18	7	28	2.8974358974359	2.875	2.5	3.125	3.5	2.42857142857143	4.66666666666667	4.5	1	1	0	0	1	0	0	3	22	29	18	4	31	2.97435897435897	3.5	3.125	3.125	2.375	2.71428571428571	5	2.75
44	Female	52	Yes	No	NA	TREATED	2	1	1	1	1	1	2	1	8	25	40	17	5	21	3.07692307692308	2.75	3.75	3	3.25	2.57142857142857	6	4.5	1	1	0	0	1	0	0	3	26	44	27	4	22	3.38461538461538	2.75	4.625	3	3.125	3.42857142857143	5.83333333333333	3.5
45	Male	63	Yes	No	NA	CONTROL	NA	2	1	1	0	2	0	2	8	18	32	16	10	32	3.56410256410256	4	4.625	2.75	3.25	3.14285714285714	6.33333333333333	4.75	2	1	1	0	2	0	2	8	23	32	17	8	31	3.64102564102564	3.75	4.25	2.875	3.875	3.42857142857143	6	5.25
47	Female	44	Yes	No	NA	CONTROL	NA	2	1	2	2	1	1	2	11	17	45	27	13	27	2.74358974358974	2.75	2	2.375	4.25	2.28571428571429	5.16666666666667	4.5	1	1	2	3	2	0	2	11	11	48	30	12	29	2.87179487179487	3.25	2.125	2.5	4.25	2.14285714285714	6	5.25
48	Female	55	Yes	No	NA	TREATED	2	2	2	2	2	2	0	1	11	15	35	21	10	26	3.8974358974359	3.875	4.75	3.625	4	3.14285714285714	5.5	2.25	1	1	2	3	1	0	1	9	21	30	21	10	27	3.79487179487179	3.375	4.625	3.625	4.125	3.14285714285714	5.33333333333333	2.75
49	Female	56	No	No	NA	CONTROL	NA	2	2	3	3	2	0	1	13	15	37	22	8	24	3.28205128205128	3	3.875	3.125	3.125	3.28571428571429	5.16666666666667	3	2	1	3	3	1	0	1	11	16	34	18	12	26	3.35897435897436	2.875	3.75	3.5	3.5	3.14285714285714	6	2.75
51	Male	51	Yes	Yes	melatonin	TREATED	3	1	1	1	1	1	3	1	9	20	28	15	3	23	3.87179487179487	4.875	4.25	3.875	3.125	3.14285714285714	7	3	1	1	0	0	1	3	0	6	23	35	16	7	16	3.56410256410256	4	4.875	3.375	2.25	3.28571428571429	7	3.25
52	Female	62	Yes	No	NA	CONTROL	NA	2	2	3	0	2	0	2	11	11	32	21	17	19	4.35897435897436	3.875	4.875	4.375	5	3.57142857142857	5.33333333333333	3.25	2	1	2	0	1	0	1	7	18	37	19	8	21	3.8974358974359	4.625	4.5	3.875	3.75	2.57142857142857	5.83333333333333	3
53	Female	55	No	No	NA	CONTROL	NA	3	3	3	3	2	0	1	15	2	48	30	18	28	2.41025641025641	1.125	4	3.5	1.875	1.42857142857143	2	3.25	3	2	3	3	1	0	1	13	8	41	29	11	24	3.17948717948718	2.625	4.625	5	2	1.42857142857143	2.33333333333333	2.75
57	Female	54	Yes	Yes	Solgar and benzodiazepine	TREATED	8	1	1	2	1	1	1	2	9	12	41	28	14	29	1.84615384615385	2	1.75	2	2	1.42857142857143	4	3.5	2	1	2	0	1	0	1	7	13	45	24	9	31	2.07692307692308	2	2.125	2.5	2	1.71428571428571	4.16666666666667	4.25
59	Female	56	No	No	NA	CONTROL	NA	2	2	2	0	1	0	1	8	22	29	15	5	23	3.71794871794872	3.125	4.125	3.5	4.75	3	6.16666666666667	4.5	2	3	1	0	1	0	1	8	22	33	18	9	22	3.69230769230769	3.875	3.625	3.5	3.875	3.57142857142857	6	4.5
62	Female	62	Yes	Yes	ansiolitic	CONTROL	NA	2	3	1	1	2	2	1	12	9	39	33	17	33	2.66666666666667	2.625	2.375	3.125	3.125	2	4	5.25	2	0	2	2	1	3	1	11	9	40	28	18	27	2.56410256410256	2.625	2	3.375	2.875	1.85714285714286	4	3.5
63	Female	53	Yes	No	NA	CONTROL	NA	1	0	1	0	2	0	1	5	22	44	30	7	34	2.92307692307692	3.875	3	2.25	2.875	2.57142857142857	5.5	2.75	2	0	0	0	1	0	2	5	19	51	32	6	29	3.05128205128205	4	3.625	2.125	3.25	2.14285714285714	4.5	2.75
66	Female	53	Yes	No	NA	CONTROL	NA	2	3	1	2	2	0	1	11	11	34	18	8	29	4.20512820512821	4.5	5	4.75	3.25	3.42857142857143	5.5	3.5	1	1	0	0	1	0	0	3	22	39	17	5	25	4.28205128205128	4.5	5	4.5	3.5	3.85714285714286	5.5	2.25
68	Female	75	Yes	No	NA	CONTROL	NA	1	0	2	2	1	0	1	7	24	35	17	8	28	3.56410256410256	3.75	3.875	3.75	3.125	3.28571428571429	4.33333333333333	4	1	0	2	3	2	0	1	9	24	37	22	8	24	3.46153846153846	3.75	3.75	3.125	2.875	3.85714285714286	5	5
74	Male	75	Yes	No	NA	CONTROL	NA	1	2	1	0	1	0	1	6	25	29	15	7	22	3.43589743589744	2.5	3.5	4.25	4.375	2.42857142857143	5	4.5	1	0	1	0	1	0	1	4	28	18	11	1	19	3.41025641025641	2.375	3.625	4.5	4.125	2.28571428571429	4.66666666666667	5
75	Female	75	Yes	No	NA	CONTROL	NA	2	3	2	3	3	2	2	17	12	35	16	10	25	2.79487179487179	2.375	3.125	3.5	2.75	2.14285714285714	4.66666666666667	5	2	2	1	2	2	1	1	11	17	32	15	11	25	2.92307692307692	1.375	3.75	3.875	3.5	2	4.83333333333333	4.25
77	Female	28	Yes	No	NA	CONTROL	NA	1	1	1	0	1	2	1	7	25	36	17	3	29	3.41025641025641	3.125	3.625	4	3.625	2.57142857142857	4.16666666666667	3	1	1	1	0	1	0	0	4	29	35	25	4	28	3.23076923076923	2.875	3.5	3.875	3.375	2.42857142857143	4.33333333333333	4.5
78	Female	65	Yes	No	NA	TREATED	4	2	1	2	1	1	0	1	8	17	45	24	13	24	2.92307692307692	3.625	3.75	2.625	2.25	2.28571428571429	3.83333333333333	2.75	1	0	2	2	1	0	1	7	17	48	33	8	21	3	4.125	3.75	3	2	2	4.16666666666667	2
79	Female	43	Yes	Yes	Melatonin and valerian	CONTROL	NA	2	3	3	3	2	0	2	15	9	45	28	13	34	2.56410256410256	2.875	2.875	3.125	1.625	2.28571428571429	3.83333333333333	2.5	2	2	3	3	1	1	2	14	11	48	31	15	36	2.66666666666667	3.5	3	2.875	1.875	2	2.83333333333333	2.75
80	Female	47	No	Yes	HALCION and ALPRAZOLAM	TREATED	1	1	1	1	1	2	3	0	9	15	32	26	18	26	3.74358974358974	3.125	4.125	3.75	4.625	3	3.33333333333333	1	1	2	1	0	1	3	0	8	16	35	25	7	20	3.33333333333333	2.875	3.5	3.625	3.875	2.71428571428571	2.83333333333333	1.75
82	Female	43	Yes	Yes	Imovane	TREATED	6	1	2	2	2	2	3	2	14	12	39	25	17	32	3.53846153846154	4	4.375	2.875	3	3.42857142857143	5.33333333333333	2.25	1	2	2	1	2	3	2	13	18	39	28	15	28	3.64102564102564	4.25	4.125	3.125	2.875	3.85714285714286	6.16666666666667	3.5
86	Female	40	Yes	No	NA	TREATED	1	2	2	2	1	1	0	2	10	12	42	32	14	37	3.28205128205128	3.375	2.5	4.25	4.25	1.85714285714286	4.66666666666667	3	1	1	2	0	1	0	1	6	22	42	31	5	31	3.56410256410256	3.5	2.625	4.375	4.25	3	5.16666666666667	3.25
87	Female	68	No	No	NA	TREATED	8	2	0	3	0	1	0	1	7	18	35	17	9	33	4.15384615384615	4.375	4	4.125	4.625	3.57142857142857	7	3.75	1	0	2	0	1	0	1	5	26	31	12	4	24	4.05128205128205	4	3.625	4	4.875	3.71428571428571	6.83333333333333	3.75
88	Male	57	No	No	NA	CONTROL	NA	2	1	1	0	1	0	2	7	15	35	13	14	31	3.05128205128205	3	4	1.875	3.25	3.14285714285714	6	3.5	2	0	0	0	1	0	3	6	16	37	14	9	33	3.12820512820513	2.875	3.5	3	3.5	2.71428571428571	5	3.5
89	Female	42	Yes	Yes	NA	TREATED	8	2	2	2	3	2	3	1	15	5	45	33	13	34	2.82051282051282	4	2.125	3	2.25	2.71428571428571	6.66666666666667	4	1	2	1	1	1	0	1	7	18	41	30	8	30	3.07692307692308	4.375	2.625	3	2.5	2.85714285714286	4.83333333333333	3.5
90	Female	55	Yes	No	NA	CONTROL	NA	2	3	3	3	3	2	1	17	10	56	9	14	34	2.92307692307692	3.625	3.125	2.375	2.125	3.42857142857143	4.83333333333333	5	2	2	3	3	3	0	1	14	13	52	17	19	33	2.79487179487179	3.25	3.25	2.375	1.875	3.28571428571429	5.33333333333333	5.25
91	Female	61	Yes	Yes	xanax	TREATED	9	3	3	3	3	2	3	1	18	9	45	23	17	25	3.23076923076923	4.375	3	3.25	2.875	2.57142857142857	4.83333333333333	1.75	2	2	3	2	1	3	1	14	9	46	22	17	22	3.28205128205128	4	3.5	2.75	3.75	2.28571428571429	4.66666666666667	3.75
