# Supplementary material for: Beneficial Effects of an Online Mindfulness-Based Intervention on Sleep Quality in Italian Poor Sleepers during the COVID-19 Pandemic: A Randomized Trial
Source: Int J Environ Res Public Health. 2023 Feb 3;20(3):2724. doi: 10.3390/ijerph20032724 (PMC9914977; doi:10.3390/ijerph20032724)
Supplement: Supplementary file 1 [file ijerph-20-02724-s001.zip › Data_2.txt]

ID	Sex	Age	Nationality	Marital_status	Number_children	Dependent_children/family_members	Unpaid_loans	Education	Job	Type_employment_agreement	Employee_satisfaction	Smoker	Sport	Knowledge_about_meditation	Religious	Number_books_read_in_a_Year	Member_cultural/sportive_association	Diet	Disease_disability	Addiction	Have_you_ever_gone_to_a_psychologist	cura_psicologo
2	Female	55	Italian	Separated/Divorced	0	No	No	High school	Public or private employee	Fixed term	No	No	No	Clear idea	Yes	>3	No	Macrobiotic	Yes	No	No
4	Female	37	Non Italian	Unmarried/single	0	No	No	Degree	Freelance	Fixed term	Yes	No	Yes	Clear idea	No	2-3	No	Mediterranean	Yes	No	Yes
5	Male	50	Italian	Cohabitant/married	2	Yes	Yes	High school	Freelance	Not applicable	Yes	No	Yes	Clear idea	Yes	1	Yes	Mediterranean	No	No	Yes
6	Female	58	Italian	Separated/Divorced	1	No	No	High school	Unemployed or looking for a job	Not applicable	No	No	Yes	Clear idea	No	>3	Yes	Mediterranean	No	No	Yes
7	Female	42	Italian	Cohabitant/married	2	Yes	No	Post-degree course	Freelance	Not applicable	Yes	No	No	Vague idea	No	>3	Yes	Mediterranean	No	No	Yes
8	Male	47	Italian	Unmarried/single	0	No	No	Degree	Public or private employee	Undetermined term	Yes	Yes	Yes	Clear idea	No	>3	Yes	Mediterranean	Yes	Yes	No
10	Female	57	Italian	Separated/Divorced	3	Yes	Yes	Degree	Public or private employee	Undetermined term	No	No	Yes	Clear idea	Yes	>3	Yes	Vegan	Yes	No	Yes
11	Female	27	Italian	Unmarried/single	0	No	No	High school	Public or private employee	Undetermined term	Yes	No	Yes	Clear idea	No	>3	No	Mediterranean	No	No	Yes
14	Male	50	Italian	Separated/Divorced	2	Yes	Yes	High school	Public or private employee	Undetermined term	Yes	No	Yes	Vague idea	No	>3	Yes	Mediterranean	Yes	No	Yes
15	Female	66	Italian	Unmarried/single	0	No	No	Degree	Retired	Not applicable	Yes	No	Yes	Clear idea	No	>3	No	Mediterranean	Yes	No	Yes
18	Female	66	Non Italian	Cohabitant/married	3	No	No	Degree	Retired	Not applicable	Yes	No	Yes	Clear idea	Yes	>3	No	Mediterranean	Yes	No	No
19	Female	62	Italian	Cohabitant/married	0	No	No	Post-degree course	Public or private employee	Undetermined term	Yes	No	Yes	Vague idea	No	>3	No	Mediterranean	Yes	No	Yes
20	Male	53	Italian	Separated/Divorced	0	No	No	High school	Public or private employee	Undetermined term	No	No	Yes	Clear idea	No	2-3	No	Mediterranean	No	No	Yes
22	Female	64	Italian	Cohabitant/married	1	Yes	No	Middle school	Retired	Not applicable	Yes	No	Yes	Vague idea	Yes	>3	Yes	Mediterranean	Yes	No	Yes
23	Female	56	Italian	Cohabitant/married	1	No	No	Degree	Public or private employee	Undetermined term	Yes	No	Yes	Clear idea	Yes	>3	Yes	Mediterranean	No	No	No
26	Female	68	Italian	Cohabitant/married	2	Yes	No	Degree	Retired	Undetermined term	Yes	No	Yes	Clear idea	Yes	>3	No	Mediterranean	No	No	No
27	Female	24	Italian	Unmarried/single	0	No	No	Degree	Student	Not applicable	Yes	No	No	Vague idea	No	>3	Yes	Vegan	No	No	Yes
29	Female	36	Italian	Unmarried/single	0	No	No	Degree	Public or private employee	Undetermined term	No	No	Yes	Just heard of	Yes	>3	No	Mediterranean	No	No	Yes
30	Female	55	Italian	Separated/Divorced	2	Yes	No	Degree	Public or private employee	Undetermined term	Yes	No	Yes	Clear idea	Yes	>3	No	Mediterranean	No	No	No
32	Female	55	Italian	Separated/Divorced	1	Yes	No	Degree	Public or private employee	Undetermined term	No	No	Yes	Clear idea	No	>3	Yes	Vegetarian	No	No	Yes
33	Male	50	Italian	Unmarried/single	0	No	No	High school	Unemployed or looking for a job	Not applicable	No	No	Yes	Vague idea	Yes	>3	Yes	Mediterranean	No	No	Yes
35	Female	44	Italian	Cohabitant/married	2	Yes	Yes	High school	Public or private employee	Undetermined term	No	Yes	Yes	Clear idea	No	2-3	No	Vegan	No	No	Yes
36	Female	35	Italian	Unmarried/single	0	No	No	Degree	Public or private employee	Undetermined term	No	Yes	Yes	Vague idea	Yes	2-3	No	Mediterranean	Yes	Yes	Yes
37	Female	69	Italian	Widowed	1	No	No	Degree	Retired	Not applicable	Yes	No	Yes	Clear idea	Yes	>3	Yes	Vegan	No	No	No
38	Female	61	Italian	Cohabitant/married	0	No	No	Degree	Retired	Not applicable	Yes	No	Yes	Vague idea	Yes	>3	Yes	Mediterranean	Yes	No	No
40	Male	65	Italian	Separated/Divorced	2	No	No	Middle school	Retired	Not applicable	No	No	Yes	Clear idea	Yes	1	No	Mediterranean	No	No	No
43	Female	46	Italian	Separated/Divorced	2	Yes	Yes	Degree	Public or private employee	Undetermined term	Yes	Yes	Yes	Clear idea	No	2-3	No	Mediterranean	No	Yes	Yes
44	Female	52	Italian	Cohabitant/married	1	No	No	Degree	Public or private employee	Undetermined term	Yes	No	Yes	Clear idea	No	>3	No	Mediterranean	No	No	No
45	Male	63	Italian	Cohabitant/married	1	Yes	No	Degree	Public or private employee	Undetermined term	Yes	No	Yes	Vague idea	No	>3	No	Mediterranean	No	No	Yes
46	Female	63	Italian	Unmarried/single	1	No	Yes	Degree	Public or private employee	Undetermined term	No	No	No	Vague idea	No	>3	No	Mediterranean	Yes	Yes	Yes
47	Female	44	Italian	Separated/Divorced	2	Yes	Yes	High school	Public or private employee	Undetermined term	Yes	Yes	No	Clear idea	No	2-3	No	Mediterranean	No	No	Yes
48	Female	55	Italian	Separated/Divorced	1	Yes	No	High school	Public or private employee	Undetermined term	Yes	No	No	Vague idea	No	>3	Yes	Vegetarian	No	No	Yes
49	Female	56	Italian	Unmarried/single	0	No	No	Degree	Public or private employee	Fixed term	No	Yes	No	Clear idea	No	>3	No	Mediterranean	Yes	No	No
51	Male	51	Italian	Cohabitant/married	0	No	Yes	Degree	Freelance	Not applicable	Yes	No	Yes	Clear idea	No	>3	No	Mediterranean	Yes	No	No
52	Female	62	Italian	Separated/Divorced	3	No	No	High school	Unemployed or looking for a job	Not applicable	No	No	Yes	Clear idea	No	>3	Yes	Vegetarian	No	No	No
53	Female	55	Italian	Cohabitant/married	1	Yes	Yes	High school	Public or private employee	Undetermined term	Yes	No	No	Vague idea	Yes	>3	No	Mediterranean	No	No	No
57	Female	54	Italian	Cohabitant/married	0	No	No	Post-degree course	Public or private employee	Fixed term	No	Yes	No	Vague idea	No	>3	No	Mediterranean	No	No	Yes
59	Female	56	Italian	Separated/Divorced	1	Yes	No	High school	Public or private employee	Fixed term	Yes	No	Yes	Vague idea	No	>3	No	Mediterranean	No	No	Yes
62	Female	62	Italian	Unmarried/single	0	No	No	Degree	Public or private employee	Undetermined term	Yes	No	Yes	Vague idea	No	>3	No	Mediterranean	Yes	No	No
63	Female	53	Italian	Cohabitant/married	0	No	Yes	Post-degree course	Freelance	Not applicable	Yes	No	Yes	Clear idea	No	>3	Yes	Mediterranean	No	No	Yes
66	Female	53	Italian	Cohabitant/married	0	No	No	Degree	Freelance	Not applicable	Yes	No	Yes	Clear idea	Yes	>3	Yes	Macrobiotic	No	No	Yes
68	Female	75	Italian	Cohabitant/married	2	No	No	Degree	Retired	Undetermined term	Yes	No	Yes	Clear idea	Yes	>3	No	Mediterranean	No	No	No
74	Male	75	Italian	Cohabitant/married	2	No	No	High school	Retired	Not applicable	Yes	No	Yes	Clear idea	Yes	1	No	Mediterranean	No	No	No
75	Female	75	Italian	Cohabitant/married	2	No	No	High school	Retired	Not applicable	Yes	No	No	Clear idea	Yes	1	No	Mediterranean	Yes	No	Yes
77	Female	28	Italian	Unmarried/single	0	No	No	Post-degree course	Freelance	Not applicable	No	No	Yes	Clear idea	Yes	1	No	Mediterranean	No	No	Yes
78	Female	65	Italian	Cohabitant/married	2	Yes	No	Degree	Public or private employee	Undetermined term	Yes	No	Yes	Clear idea	No	>3	No	Mediterranean	Yes	No	Yes
79	Female	43	Italian	Cohabitant/married	2	Yes	No	Post-degree course	Public or private employee	Fixed term	No	No	Yes	Vague idea	Yes	2-3	No	Mediterranean	No	No	Yes
80	Female	47	Italian	Cohabitant/married	1	No	No	High school	Housewife o simile	Not applicable	Yes	No	No	Vague idea	No	2-3	No	Mediterranean	Yes	No	No
81	Female	57	Italian	Separated/Divorced	1	No	No	High school	Public or private employee	Undetermined term	Yes	No	Yes	Clear idea	Yes	1	No	Mediterranean	Yes	No	Yes
82	Female	43	Italian	Cohabitant/married	2	Yes	Yes	High school	Public or private employee	Undetermined term	Yes	No	No	Clear idea	Yes	>3	Yes	Mediterranean	No	No	Yes
86	Female	40	Italian	Cohabitant/married	2	No	No	High school	Housewife o simile	Not applicable	No	No	Yes	Clear idea	Yes	2-3	No	Mediterranean	No	No	No
87	Female	68	Italian	Cohabitant/married	1	No	No	Degree	Retired	Not applicable	Yes	Yes	Yes	Vague idea	No	>3	No	Mediterranean	No	No	No
88	Male	57	Italian	Cohabitant/married	2	Yes	Yes	Degree	Public or private employee	Undetermined term	Yes	No	No	Vague idea	No	>3	No	Mediterranean	Yes	No	Yes
89	Female	42	Italian	Cohabitant/married	0	No	No	Degree	Public or private employee	Undetermined term	No	No	Yes	Vague idea	Yes	>3	Yes	Macrobiotic	Yes	No	Yes
90	Female	55	Italian	Separated/Divorced	2	Yes	Yes	High school	Public or private employee	Undetermined term	Yes	No	Yes	Clear idea	Yes	2-3	No	Mediterranean	No	No	No
91	Female	61	Italian	Separated/Divorced	0	No	No	High school	Retired	Not applicable	No	No	Yes	Clear idea	Yes	>3	No	Mediterranean	No	No	Yes
